# Supplementary material for: Paramyxovirus matrix proteins modulate host cell translation via exon-junction complex interactions in the cytoplasm
Source: PubMed Central journal article supplement — bioRxiv. 2024 Sep 7:2024.09.05.611502. Preprint. [Version 1] doi: 10.1101/2024.09.05.611502 (PMC11398453; doi:10.1101/2024.09.05.611502), 2024-09-07
Supplement: NIHPP2024.09.05.611502v1-supplement-1.pdf [file NIHPP2024.09.05.611502v1-supplement-1.pdf]

873

874 **SUPPLEMENTAL INFORMATION TITLES AND LEGENDS**

875

876 **Supplemental information**

877 Document S1. Figures S1-S8 and Table S1

878 Data S1. Excel file containing data too large to fit in a PDF, related to Figure 3

879 Data S2. Excel file containing data too large to fit in a PDF, related to Figure 4

880

881 **Figure S1. Mutagenesis studies of nuclear localization signals (NLSs) and nuclear**  
882 **export signals (NESs) in GFP fused HPIV3-M and NiV-M.**

883 (A) Positively charged amino acid residues in the bipartite NLSs or key leucine residues in the  
884 potential NESs were mutated to alanine. (B) HeLa cells expressing either wild-type (WT), NLS  
885 mutant (Mbp1/2), or NES mutant (L106A L107A) forms of GFP-fused HPIV3-M and NiV-M  
886 were fixed and stained with Hoechst to visualize nuclei. Representative fields of cells  
887 expressing each construct are shown. Scale bars represent 20  $\mu\text{m}$  (C) Quantification of the  
888 cytoplasmic/nuclear GFP intensity (C: N) ratios for 30–50 individual cells was analyzed for  
889 each mutant, as described in the Materials and Methods. Statistical significance was  
890 determined by one-way ANOVA with Dunnett's multiple comparison test. \*\*\*\* P < 0.0001.

891

892 **Figure S2. Effects of HPIV3 infection and matrix protein on host translational profile.**

893 (A) Polysome profiles of mock-infected (black), HPIV3 infected (blue), or HPIV3-M transfected  
894 (red) HEK-293Ts at 48 hrs post-infection. HEK-293Ts were infected with HPIV3 (MOI of 5) or  
895 transfected with matrix for 48 hrs and cytoplasmic extracts were prepared for polysome  
896 profiling. Cytoplasmic extracts were sedimented through a 10–50% sucrose gradient and 0.6  
897 ml fractions were collected while continuously measuring absorbance at  $\lambda = 254\text{nm}$ . (B)

898 Proteins were TCA precipitated from the collected fraction with equal volume and analyzed by  
899 immunoblotting to determine the sedimentation of S6, L7a, eIF4AIII, Y14, MAGOH, and HPIV3-  
900 M with ribosomal subunits, monosomes, or polysomes. (C-D) Densitometric quantification of  
901 the indicated proteins (S6 and L7a) across 16 fractions from (B). The y-axis shows the  
902 percentage of the total integrated intensity (% of Total Int) for each protein in the indicated  
903 condition: mock infection (black), HPIV3 infection (blue), and HPIV3 matrix protein expression  
904 (red).

905

906 **Figure S3. Nuclear-cytoplasmic trafficking of HPIV3 matrix protein (HPIV3-M)**  
907 **during infection.**

908 (A) HeLa cells infected with HPIV3 at m.o.i of 5 and then incubated with fresh growth medium  
909 for up to 24 hrs. At 12, 16, 20, and 24 hours of post-infection, cells were fixed and  
910 counterstained with anti-HPIV3-M antibody (red) to label viral matrix protein, and nuclei were  
911 stained with Hoechst (blue). Representative fields of cells at each time point are shown. Scale  
912 bars represent 20  $\mu$ m (B) Quantification of cytoplasmic/nuclear HPIV3-M intensity (C: N)  
913 ratios was performed on 30–50 individual cells, as described in the Materials and Methods.  
914 Statistical significance was analyzed by one-way ANOVA with Dunnett. \*\*\*\*  $P < 0.0001$ ; ns,  
915 not significant.

916

917 **Figure S4. Effects of the exon junction complex on Paramyxovirus infection.**

918 HEK-293T cells were transfected with siRNA pools targeting eIF4A3, Y14, MAGOH, or non-  
919 targeting control siRNAs (NC), respectively. At 48 hrs post-transfection, cells were inoculated  
920 with the designated virus (A) HPIV3, (B) Cedar, (C) MuV, and (D) NDV at a multiplicity of  
921 infection (m.o.i.) of 0.01. The number of GFP-positive cells in each well was acquired at the  
922 indicated time points by Celigo imaging cytometer (Nexcelom). Relative fold changes (FC) in  
923 GFP-positive cells per well were then calculated. Symbols represent the data points from  
924 biological triplicates. Bars represent the mean of the triplicates. Statistical significance was  
925 determined by two-way ANOVA with Dunnett multiple comparison test. \*  $P < 0.05$ ; \*\*  $P < 0.01$ ;  
926 \*\*\*  $P < 0.001$ ; \*\*\*\*  $P < 0.0001$ ; ns, not significant.

927

928 **Figure S5. Subcellular localization of eIF4AIII in HeLa cells expressing GFP fused**  
929 **HPIV3 matrixes.**

930 Left panel HeLa cells expressing either wild-type (WT), NLS mutant (Nbp1/2), or NES mutant  
931 (L106A L107A) forms of GFP-fused HPIV3-M and NiV-M were fixed and stained with anti-  
932 eIF4AIII (red) and Hoechst for nuclei (blue), and GFP fluorescence indicates M expression.

933 Representative fields of cells for each condition are shown. Scale bars represent 20  $\mu\text{m}$ . Right  
934 panel: Quantification of cytoplasmic/nuclear eIF4AIII intensity (C: N) ratios was performed on  
935 30 individual cells, as described in Materials and Methods. Statistical significance was analyzed  
936 by one-way ANOVA with Dunnett multiple comparison test. \*\*\*\*  $P < 0.0001$ ; ns, not  
937 significant.

938

939 **Figure S6. Effects of HPIV3 infection on NMD activity.**

940 HEK-293T cells infected with HPIV3 at m.o.i of 0.01 and analyzed at 24 and 48 hours of post-  
941 infection. Endogenous targets of the NMD mRNA surveillance pathway, SC35, GABARAPL1,  
942 ASNS, and CARS were analyzed by quantitative RT-PCR. Relative quantification (Gene/GAPDH)  
943 is normalized to uninfected controls. Symbols are data points from biological triplicates. Bar  
944 represents the mean  $\pm$  SD. Statistical significance was determined by one-way ANOVA with  
945 Dunnett multiple comparison test. \*  $P < 0.05$ ; \*\*\*\*  $P < 0.0001$ ; ns, not significant.

946

947 **Figure S7. Effects of HPIV3 matrix on NMD activity.**

948 HEK-293T cells were transfected with the indicated protein and analyzed at 24 and 48 hrs  
949 post-transfection. Endogenous targets of the NMD mRNA surveillance pathway, SC35,  
950 GABARAPL1, ASNS, and CARS were analyzed by quantitative RT-PCR. Relative quantification  
951 (Gene/GAPDH) is normalized to uninfected controls. Symbols are data points from biological  
952 triplicates. Bar represents the mean  $\pm$  SD. Statistical significance was determined by two-  
953 way ANOVA with Bonferroni's multiple comparisons test. ns, not significant.

954

955 **Figure S8. Recovery of rHPIV3 $\Delta$ M-mCherry and rHPIV3 $\Delta$ M viruses in BSR-T7 cells.**

956 Representative images from the rescue of (A) rHPIV3 $\Delta$ M-mCherry and (B) rHPIV3 $\Delta$ M at day  
957 3 of post-transfection in BSR-T7 cells. Images were captured by EVOS m5000.

958

959 **Table S1: qPCR primers, related to Star Methods.**

960

961 **Data S1: Mapped viral read counts of polysome profile mRNA sequencing for  
962 HPIV3-WT and HPIV3-delta-M virus.**

963 Tab 1: TPM normalized viral genes expression for HPIV3-WT and HPIV3-delta-M virus.

964 Tab 2: Ribosome association efficiency of viral transcripts for HPIV3-WT and HPIV3-delta-M  
965 virus.

966

967 **Data S2. Mapped read count of polysome profile mRNA sequencing for Mock,**  
968 **HPIV3-WT and HPIV3-delta-M samples.**

## Figure S1.

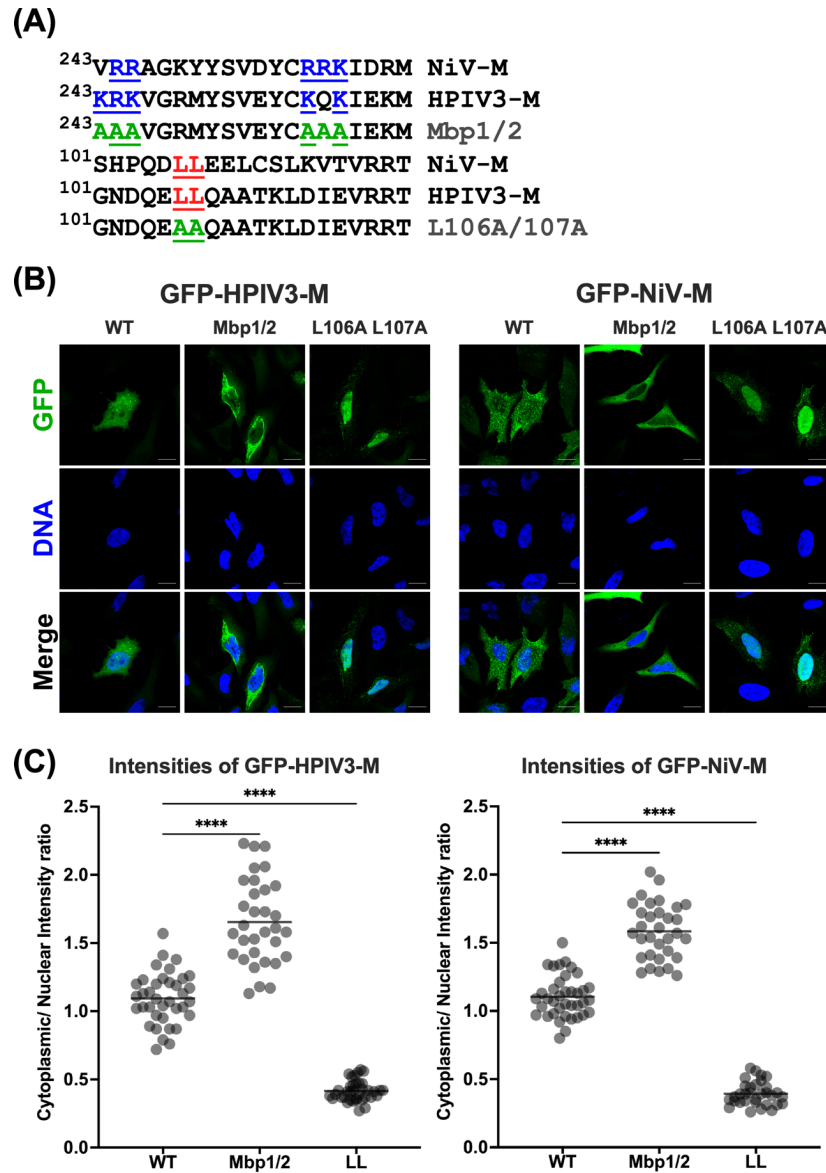

**Figure S1. Mutagenesis studies of nuclear localization signals (NLSs) and nuclear export signals (NESs) in GFP fused HPIV3-M and NiV-M.** (A) Positively charged amino acid residues in the bipartite NLSs or key leucine residues in the potential NESs were mutated to alanine. (B) HeLa cells expressing either wild-type (WT), NLS mutant (Mbp1/2), or NES mutant (L106A L107A) forms of GFP-fused HPIV3-M and NiV-M were fixed and stained with Hoechst to visualize nuclei. Representative fields of cells expressing each construct are shown. Scale bars represent 20  $\mu$ m (C) Quantification of the cytoplasmic/nuclear GFP intensity (C: N) ratios for 30–50 individual cells was analyzed for each mutant, as described in the Materials and Methods. Statistical significance was determined by one-way ANOVA with Dunnett's multiple comparison test. \*\*\*\* P < 0.0001.

## Figure S2.

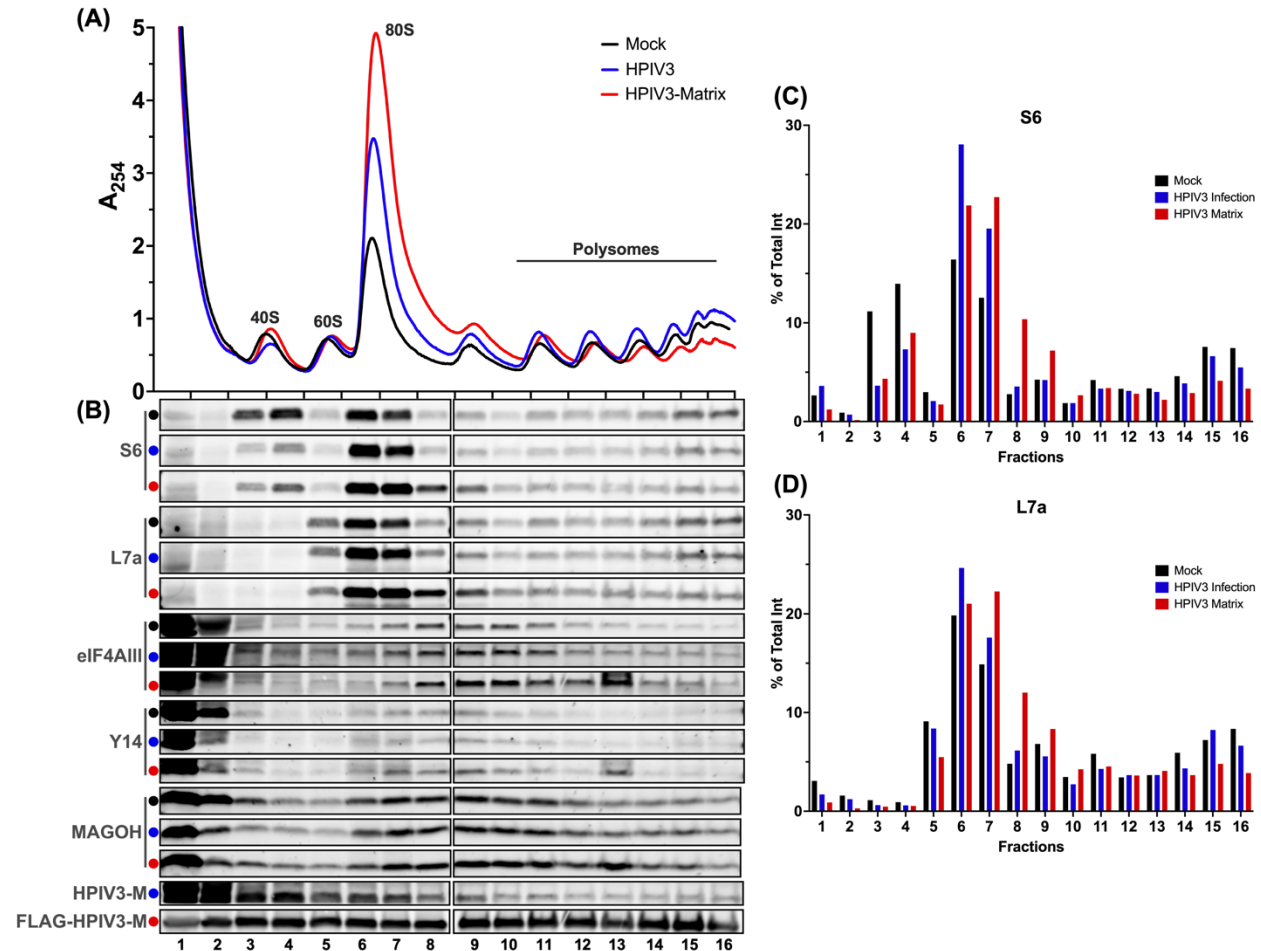

**Figure S2. Effects of HPIV3 infection and matrix protein on host translational profile.** (A) Polysome profiles of mock-infected (black), HPIV3 infected (blue), or HPIV3-M transfected (red) HEK-293Ts at 48 hrs post-infection. HEK-293Ts were infected with HPIV3 (MOI of 5) or transfected with matrix for 48 hrs and cytoplasmic extracts were prepared for polysome profiling. Cytoplasmic extracts were sedimented through a 10–50% sucrose gradient and 0.6 ml fractions were collected while continuously measuring absorbance at  $\lambda = 254\text{nm}$ . (B) Proteins were TCA precipitated from the collected fraction with equal volume and analyzed by immunoblotting to determine the sedimentation of S6, L7a, eIF4AIII, Y14, MAGOH, and HPIV3-M with ribosomal subunits, monosomes, or polysomes. (C-D) Densitometric quantification of the indicated proteins (S6 and L7a) across 16 fractions from (B). The y-axis shows the percentage of the total integrated intensity (% of Total Int) for each protein in the indicated condition: mock infection (black), HPIV3 infection (blue), and HPIV3 matrix protein expression (red).

## Figure S3.

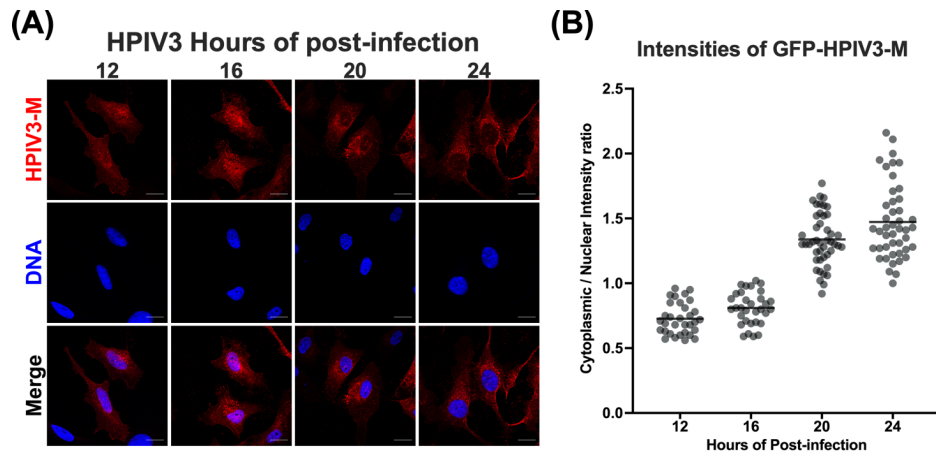

**Figure S3. Nuclear-cytoplasmic trafficking of HPIV3 matrix protein (HPIV3-M) during infection.** (A) HeLa cells infected with HPIV3 at m.o.i of 5 and then incubated with fresh growth medium for up to 24 hrs. At 12, 16, 20, and 24 hours of post-infection, cells were fixed and counterstained with anti-HPIV3-M antibody (red) to label viral matrix protein, and nuclei were stained with Hoechst (blue). Representative fields of cells at each time point are shown. Scale bars represent 20  $\mu$ m (B) Quantification of cytoplasmic/nuclear HPIV3-M intensity (C: N) ratios was performed on 30–50 individual cells, as described in the Materials and Methods. Statistical significance was analyzed by one-way ANOVA with Dunnett. \*\*\*\*  $P < 0.0001$ ; ns, not significant.

## Figure S4.

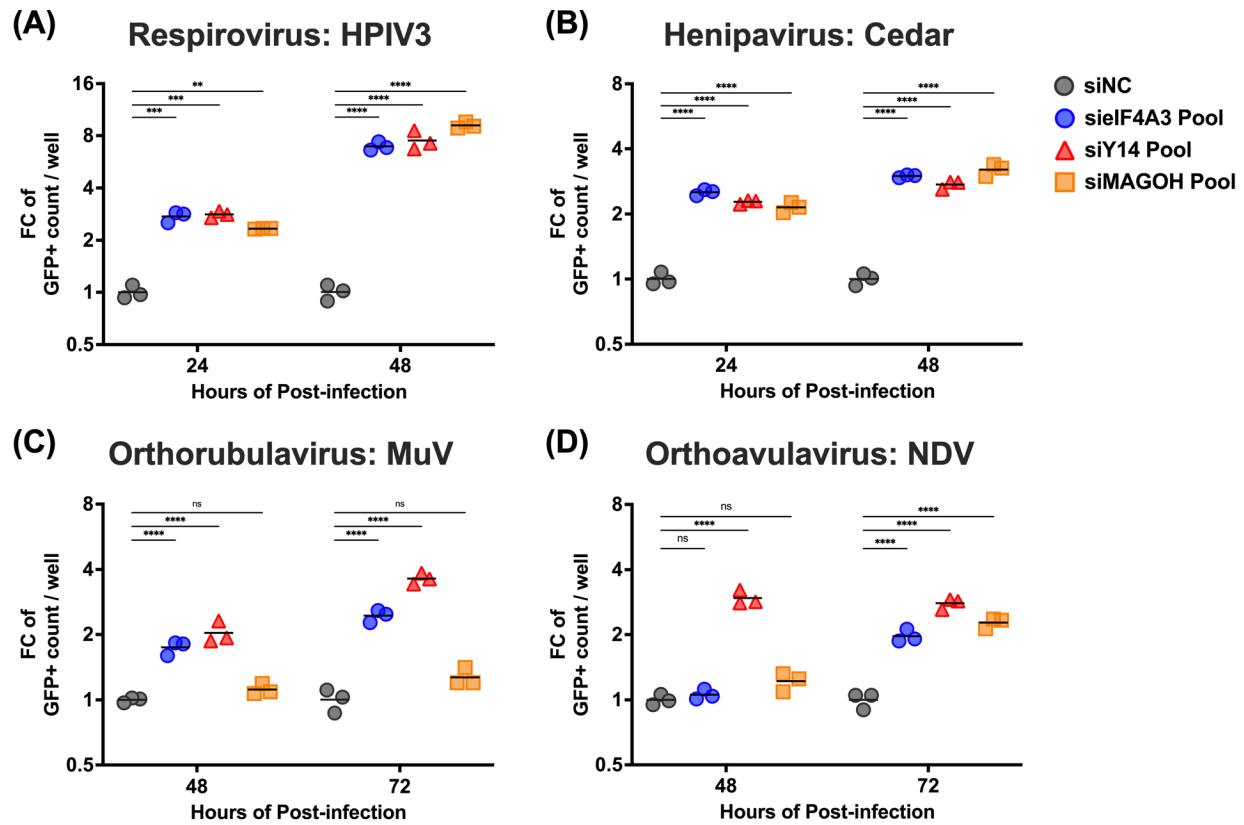

**Figure S4. Effects of the exon junction complex on Paramyxovirus infection.** HEK-293T cells were transfected with siRNA pools targeting eIF4A3, Y14, MAGOH, or non-targeting control siRNAs (NC), respectively. At 48 hrs post-transfection, cells were inoculated with the designated virus (A) HPIV3, (B) Cedar, (C) MuV, and (D) NDV at a multiplicity of infection (m.o.i.) of 0.01. The number of GFP-positive cells in each well was acquired at the indicated time points by Celigo imaging cytometer (Nexcelom). Relative fold changes (FC) in GFP-positive cells per well were then calculated. Symbols represent the data points from biological triplicates. Bars represent the mean of the triplicates. Statistical significance was determined by two-way ANOVA with Dunnett multiple comparison test. \*  $P < 0.05$ ; \*\*  $P < 0.01$ ; \*\*\*  $P < 0.001$ ; \*\*\*\*  $P < 0.0001$ ; ns, not significant.



## Figure S5.

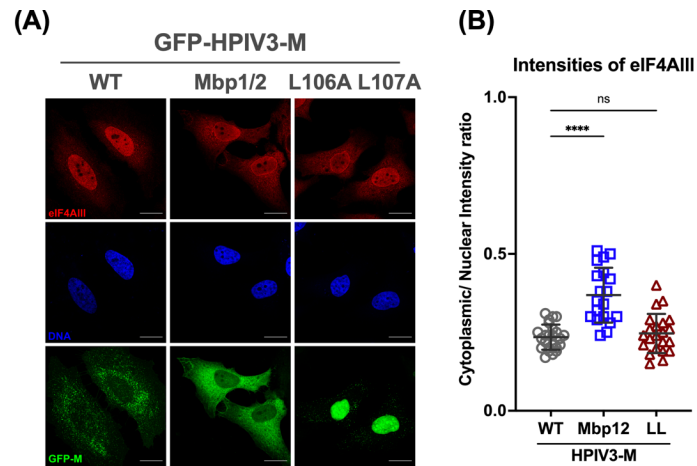

**Figure S5. Subcellular localization of eIF4AIII in HeLa cells expressing GFP fused HPIV3 matrixes.** Left panel HeLa cells expressing either wild-type (WT), NLS mutant (Nbp1/2), or NES mutant (L106A L107A) forms of GFP-fused HPIV3-M and NiV-M were fixed and stained with anti-eIF4AIII (red) and Hoechst for nuclei (blue), and GFP fluorescence indicates M expression. Representative fields of cells for each condition are shown. Scale bars represent 20  $\mu\text{m}$ . Right panel: Quantification of cytoplasmic/nuclear eIF4AIII intensity (C: N) ratios was performed on 30 individual cells, as described in Materials and Methods. Statistical significance was analyzed by one-way ANOVA with Dunnett multiple comparison test. \*\*\*\*  $P < 0.0001$ ; ns, not significant.

**Figure S6.**

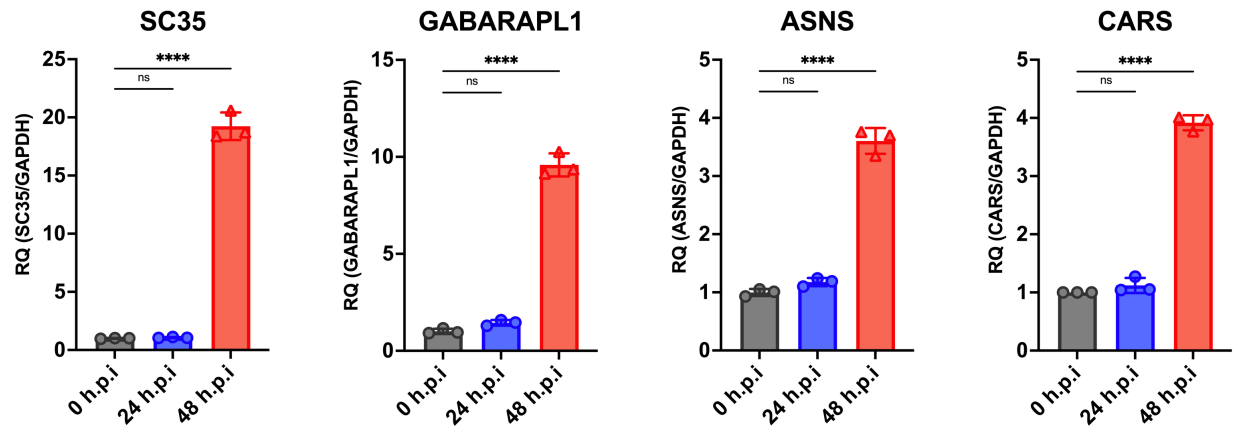

**Figure S6. Effects of HPIV3 infection on NMD activity.** HEK-293T cells infected with HPIV3 at m.o.i of 0.01 and analyzed at 24 and 48 hours of post-infection. Endogenous targets of the NMD mRNA surveillance pathway, SC35, GABARAPL1, ASNS, and CARS were analyzed by quantitative RT-PCR. Relative quantification (Gene/GAPDH) is normalized to uninfected controls. Symbols are data points from biological triplicates. Bar represents the mean  $\pm$  SD. Statistical significance was determined by one-way ANOVA with Dunnett multiple comparison test. \* P < 0.05; \*\*\*\* P < 0.0001; ns, not significant.

## Figure S7.

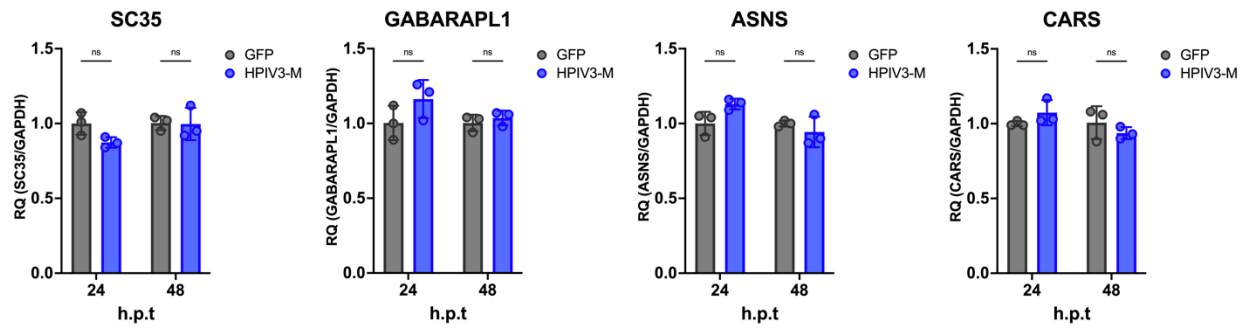

**Figure S7. Effects of HPIV3 matrix on NMD activity.** HEK-293T cells were transfected with the indicated protein and analyzed at 24 and 48 hrs post-transfection. Endogenous targets of the NMD mRNA surveillance pathway, SC35, GABARAPL1, ASNS, and CARS were analyzed by quantitative RT-PCR. Relative quantification (Gene/GAPDH) is normalized to uninfected controls. Symbols are data points from biological triplicates. Bar represents the mean  $\pm$  SD. Statistical significance was determined by two-way ANOVA with Bonferroni's multiple comparisons test. ns, not significant.

## Figure S8.

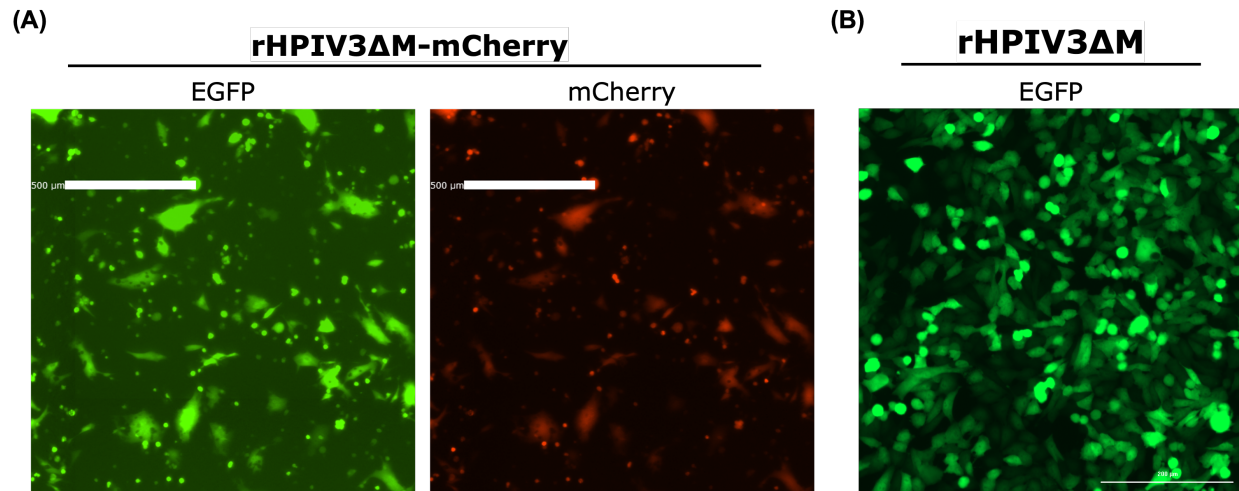

**Figure S8. Recovery of rHPIV3ΔM-mCherry and rHPIV3ΔM viruses in BSR-T7 cells.** Representative images from the rescue of (A) rHPIV3ΔM-mCherry and (B) rHPIV3ΔM at day 3 of post-transfection in BSR-T7 cells. Images were captured by EVOS m5000.

## Table S1.

Table S1: qPCR primers, related to Star Methods.

| Gene           | Forward Primer (5' to 3')  | Reverse Primer (5' to 3') |
|----------------|----------------------------|---------------------------|
| SC35           | CGGTGTCCTCTTAAGAAAATGATGTA | CTGCTACACAACCTGCGCCT      |
| ASNS           | GGAAGACAGCCCCGATTTACT      | AGCACGAACTGTTGTAATGTCA    |
| CARS           | CCATGCAGACTCCACCTTTAC      | GCAATACCACGTCACCTTTTTTC   |
| GABARAPL1      | GGCCAGTTCTACTTCTTAATCCGG   | AGGTGCTCCCATCTGCTGGG      |
| NiV_N          | CGTGGTTATCTTGAGCCTATGT     | TCCCAGTCTATTTGCCATGTT     |
| NiV_P          | GGAGCATCGAGAGGTCAATAAG     | GGACTTTGGCATCGGAGTT       |
| NiV_L          | GCGTCTCAGAGGGTAAACATAG     | GAGTACACTCCCTGCAAACCTTA   |
| NiV_Genome     | TCTCCCAGAGTCTATCAGTAAGG    | TCCCAGTCTATTTGCCATGTT     |
| NiV_Antigenome | AACTTAGGAACCAAGACAAACAC    | CTAGCCGCCTCTTCAAAGATA     |
| 18S            | GTAACCCGTTGAACCCCAT        | CCATCCAATCGGTAGTAGCG      |
| GAPDH          | CCACATCGCTCAGACACCAT       | AAAAGCAGCCCTGGTGACC       |
| Luciferase     | GATCCTCAACGTGCAAAGAAGC     | TCACGAAGGTGTACATGCTTTGG   |
